# Supplementary material for: Separation of taurine and Na 2 SO 4 via the in situ formation of deep eutectic solvents: experiments and computational simulation
Source: Royal Society of Chemistry journal article supplement (doi:10.1039/d5nj04739k), 2026-01-01
Supplement: d5nj04739k1.pdf [file d5nj04739k1.pdf]

## Supporting Information

### **Separation of Taurine and Na<sub>2</sub>SO<sub>4</sub> Using in Situ Formation of Deep Eutectic Solvents: Experiments and Computation Simulation**

Xiaojun Bao, Yu Cao, Lei Gong, Renjiang Li, Dongshun Deng \*

*State Key Laboratory of Advanced Separation Membrane Materials, Zhejiang  
Province Key Laboratory of Biofuel, College of Chemical Engineering, Zhejiang  
University of Technology, Hangzhou 310014, China.*

**\*Corresponding author:**

Address: State Key Laboratory of Advanced Separation Membrane Materials,  
Zhejiang Province Key Laboratory of Biofuel, College of Chemical Engineering,  
Zhejiang University of Technology, Hangzhou 310014, China.

Email: [dengdsh@zjut.edu.cn](mailto:dengdsh@zjut.edu.cn)

## The identification of present mixture as DES

Based on DSC results, the melting points of Tau/MEA (1:5) DES was 270 K. And the value was expressed in the solid-liquid equilibrium (SLE) diagram as Figure S1. The red lines was obtained by the melting points and  $\Delta_{\text{fus}}H$  (the enthalpy of fusion) of two pure compounds [1,2]. It can be seen that the melting point of the prepared mixture was lower than the ideal eutectic point represented as  $T_{\text{E, ideal}}$ . Therefore, the present mixture can be named as DES according to the broad definition.

The melting point of ideal binary mixture was calculated as following,

$$\frac{1}{T_m} = \frac{1}{T_{m,A}} + \frac{R}{H_{\text{fus},A}} \ln \frac{1}{x_A} \quad (\text{S1})$$

Where  $T_{m,A}$  is the melting point of pure substance A,  $H_{\text{fus},A}$  is the fusion enthalpy of A,  $x_A$  is the molar fraction of A, and  $R$  is ideal gas constant.

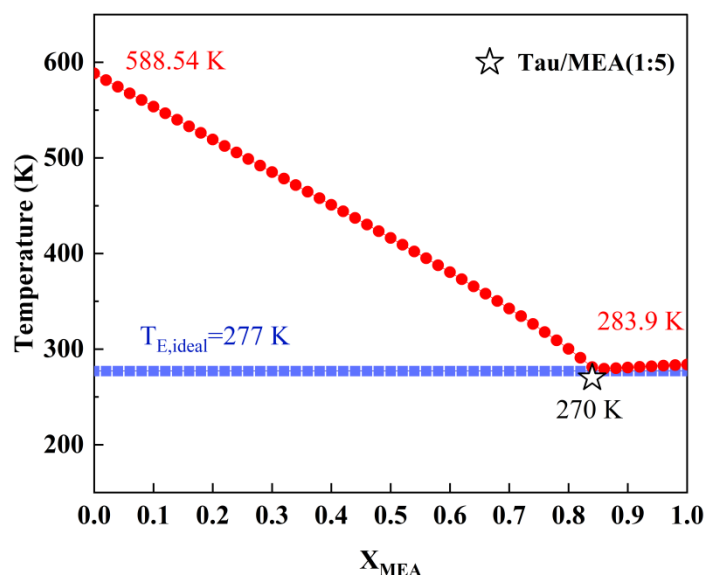

**Figure. S1.** Melting point and ideal binary solution phase diagram for Tau/MEA (1:5) DES.

[1] X.-W. Han, C.-R. Zhou, X.-H. Shi, Determination of specific heat capacity and standard molar combustion enthalpy of taurine by DSC. J Therm Anal Calorim 2012;109:441-6. <https://doi.org/10.1007/s10973-011-1670-y>.

[2] A. Penttilä, P. Uusi-Kyyny, A. Salminen, J. Seppälä, V. Alopaeus, A comprehensive thermodynamic study of heat stable acetic acid salt of monoethanolamine. International Journal of Greenhouse Gas Control 2014;22:313-24. <https://doi.org/10.1016/j.ijggc.2013.12.001>.

### The selectivity parameter between taurine and Na<sub>2</sub>SO<sub>4</sub>

The selectivity parameter between taurine and Na<sub>2</sub>SO<sub>4</sub> was calculated to further demonstrate the effectiveness of the separation strategy, which are defined as follows:

$$S = \frac{m_T}{m_S} \quad (S2)$$

where  $m_T$  and  $m_S$  are the solubility of Tau and Na<sub>2</sub>SO<sub>4</sub> in the DES, respectively.

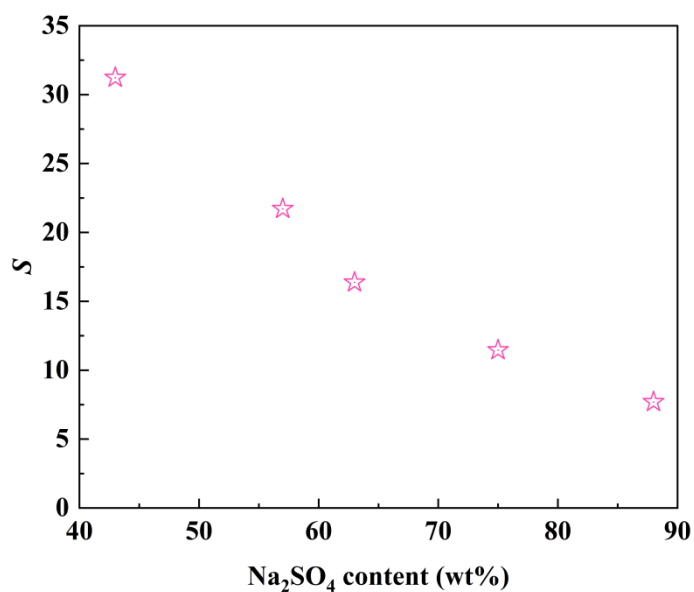

**Figure. S2.** The selectivity parameter between taurine and Na<sub>2</sub>SO<sub>4</sub>.

**The raw data of Tau yield affected by molar ratio under the condition of Tau:Na<sub>2</sub>SO<sub>4</sub> (3:4, mass ratio)**

#### Experiment-1

| Molar ratio<br>(Tau:MEA) | Original Tau/g | Recycled Tau/g | Yield% |
|--------------------------|----------------|----------------|--------|
| 1:5                      | 3.7459         | 3.6528         | 97.51  |
| 1:6                      | 3.6720         | 3.1593         | 86.04  |
| 1:7                      | 3.8438         | 3.1375         | 81.62  |
| 1:8                      | 4.3676         | 3.6169         | 82.81  |
| 1:9                      | 3.8245         | 3.8171         | 99.08  |

**Experiment-2**

| Molar ratio<br>(Tau:MEA) | Original Tau/g | Recycled Tau/g | Yield% |
|--------------------------|----------------|----------------|--------|
| 1:5                      | 12.3321        | 12.256         | 99.38  |
| 1:6                      | 3.9715         | 3.3288         | 83.82  |
| 1:7                      | 3.9171         | 3.1375         | 80.10  |
| 1:8                      | 3.7206         | 3.2122         | 86.33  |
| 1:9                      | 3.4922         | 3.2720         | 93.69  |

**Experiment-3**

| Molar ratio<br>(Tau:MEA) | Original Tau/g | Recycled Tau/g | Yield% |
|--------------------------|----------------|----------------|--------|
| 1:5                      | 3.7525         | 3.6479         | 97.21  |
| 1:6                      | 3.7407         | 3.2073         | 85.74  |
| 1:7                      | 4.1681         | 3.3919         | 81.38  |
| 1:8                      | 3.8427         | 3.2221         | 83.85  |
| 1:9                      | 3.5032         | 3.3690         | 96.17  |

**Raw data of the experiment affected by Na<sub>2</sub>SO<sub>4</sub> content.****Experiment-1**

| Na <sub>2</sub> SO <sub>4</sub><br>content/wt% | Original Tau/g | Recycled<br>Tau/g | Original<br>Na <sub>2</sub> SO <sub>4</sub> /g | Removal<br>Na <sub>2</sub> SO <sub>4</sub> /g |
|------------------------------------------------|----------------|-------------------|------------------------------------------------|-----------------------------------------------|
| 43                                             | 3.9132         | 3.8349            | 2.9349                                         | 2.8121                                        |
| 57                                             | 3.5955         | 3.5329            | 4.794                                          | 4.6340                                        |
| 63                                             | 3.3728         | 2.9046            | 5.6213                                         | 5.4439                                        |
| 75                                             | 2.0382         | 1.3792            | 6.1146                                         | 5.9942                                        |
| 88                                             | 1.0767         | 0.5706            | 7.5369                                         | 7.4627                                        |

**Experiment-2**

| Na <sub>2</sub> SO <sub>4</sub><br>content/wt% | Original Tau/g | Recycled<br>Tau/g | Original<br>Na <sub>2</sub> SO <sub>4</sub> /g | Removal<br>Na <sub>2</sub> SO <sub>4</sub> /g |
|------------------------------------------------|----------------|-------------------|------------------------------------------------|-----------------------------------------------|
| 43                                             | 3.6651         | 3.5918            | 2.7488                                         | 2.6338                                        |
| 57                                             | 3.4876         | 3.4269            | 4.6501                                         | 4.4950                                        |
| 63                                             | 3.0383         | 2.6166            | 5.0638                                         | 4.9040                                        |
| 75                                             | 2.4522         | 1.6594            | 7.3566                                         | 7.2118                                        |
| 88                                             | 1.1696         | 0.6199            | 8.1872                                         | 8.1067                                        |

**Experiment-3**

| Na <sub>2</sub> SO <sub>4</sub><br>content/wt% | Original Tau/g | Recycled<br>Tau/g | Original<br>Na <sub>2</sub> SO <sub>4</sub> /g | Removal<br>Na <sub>2</sub> SO <sub>4</sub> /g |
|------------------------------------------------|----------------|-------------------|------------------------------------------------|-----------------------------------------------|
| 43                                             | 4.0435         | 3.9626            | 3.0326                                         | 2.9058                                        |
| 57                                             | 3.3369         | 3.2788            | 4.4492                                         | 4.3008                                        |
| 63                                             | 2.8642         | 2.4666            | 4.7737                                         | 4.6230                                        |
| 75                                             | 2.2532         | 1.5247            | 6.7596                                         | 6.6266                                        |
| 88                                             | 1.1729         | 0.6216            | 8.2103                                         | 8.1295                                        |
